# Supplementary material for: Core and surface microgel mechanics are differentially sensitive to alternative crosslinking concentrations
Source: Royal Society of Chemistry journal article supplement (doi:10.1039/c7sm00727b), 2017-01-01
Supplement: c7sm00727b1.pdf [file c7sm00727b1.pdf]

## Core and surface microgel mechanics are differentially sensitive to alternative crosslinking concentrations

Himansu Mohapatra<sup>1</sup>, Terra M. Kruger<sup>1</sup>, Thiranjeeva I. Lansakara<sup>2</sup>, Alexei V. Tivanski<sup>2</sup> and Lewis L. Stevens<sup>1\*</sup>

1. Division of Pharmaceutics and Translational Therapeutics, College of Pharmacy, The University of Iowa, Iowa City, IA 52242

2. Department of Chemistry, The University of Iowa, Iowa City, IA 52242

### Supporting Information

#### AFM nanoindentation analysis of pS-co-NIPAM, pS and pNIPAM particles.

AFM nanoindentation<sup>1-2</sup> technique was utilized to obtain Young's modulus (stiffness) values of individual pS-co-NIPAM, pS and pNIPAM particles. The Young's modulus was determined by fitting the loading force *versus* indentation depth approach data to Jonsen-Kendall-Roberts (JKR) model<sup>3</sup>.

$$a_{JKR} = \frac{3R^* F_{JKR}}{4E^*} \quad (1)$$

$$F_{JKR} = F + 3\pi WR^* + \sqrt{6\pi WR^* + 9\pi^2 W^2 R^{*2}} \quad (2)$$

$$h_{JKR} = \frac{a_{JKR}^2}{R^*} - \sqrt{\frac{2\pi W a_{JKR}}{E^*}} \quad (3)$$

Where  $a_{JKR}$ ,  $F_{JKR}$  and  $h_{JKR}$  are the contact area radius, force acting between two spheres and indentation depth, respectively.  $W$  is the work of adhesion which can be determined directly by measuring the adhesion force between AFM tip and pS-co-NIPAM particles using the retract force *versus* vertical piezo position data<sup>4</sup>.

$$\frac{1}{R^*} = \frac{1}{R_1} + \frac{1}{R_2} \quad (4)$$

$$\frac{1}{E^*} = \frac{1 - \nu_1^2}{E_1} + \frac{1 - \nu_2^2}{E_2} \quad (5)$$

Where  $R^*$  and  $E^*$  are the effective radius and effective Young's modulus of AFM tip and pS-co-NIPAM spheres.  $R_1$ ,  $\nu_1$ ,  $E_1$  and  $R_2$ ,  $\nu_2$ ,  $E_2$  are the radius, Poisson's ratio and Young's modulus for tip and pS-co-NIPAM particle respectively.

JKR model was preferred over Hertzian contact model due to the observation of adhesive forces between AFM tip and pS-co-NIPAM particles which were typically of ca 2 nN - 4 nN. AFM nanoindentation experiments were performed using 8 different  $\text{Si}_3\text{N}_4$  tips having a spring constant range of 0.2 – 0.8 N/m. Reported height values of nanoparticles were an average of ~100 single

particles which were obtained from AFM height images. For the Young's modulus calculations, tip radius of curvature of 10 nm and the Poisson's ratio of  $\text{Si}_3\text{N}_4$  AFM tip of 0.25 were used. Poisson's ratios which were calculated with reduced BLS frequencies as mentioned in text were used for pS-co-NIPAM samples when data were fit to the JKR model. Based on the statistical analysis, force plots which yielded extremely high stiffness values and low stiffness values were a result of tip contacting the hard Si wafer surface and the edges of pS-co-NIPAM particles, therefore those force curves were excluded from force curve analysis.<sup>5</sup> Typically, as a result of such analysis, ca 10% of the total force plots were excluded. Average Young's modulus values reported in this study for each particle composition are based from averaging of ~60 force *versus* indentation curves.

Nanoindentation on pS was done using a 25 nm tip radius of curvature having Pt coated tip (Nanosensors, Switzerland). This was because force curves and AFM images showed plastic deformation on pS nano-spheres when the  $\text{Si}_3\text{N}_4$  tips with 10 nm tip radius of curvature were used. The spring constant of this Pt tip was 2.55 N/m as determined from the thermal noise method<sup>6</sup>. Similar to the above, data were fit to the JKR model.

**Figure S1.** AFM height images of pS-co-NIPAM, pS and, pNIPAM particles

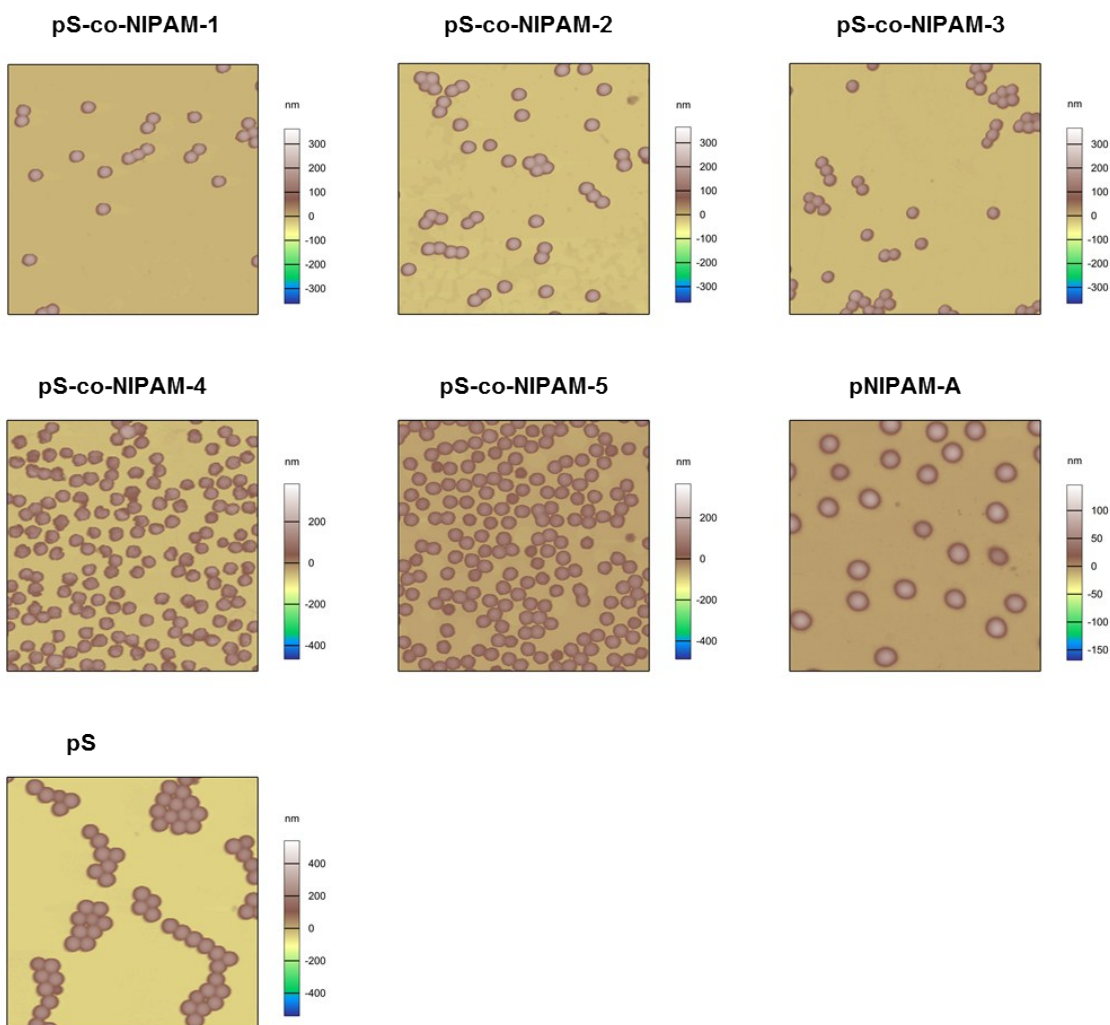

**Figure S2.** Representative force-displacement curves for pS, the pS-co-NIPAM series and pNIPAM-B.

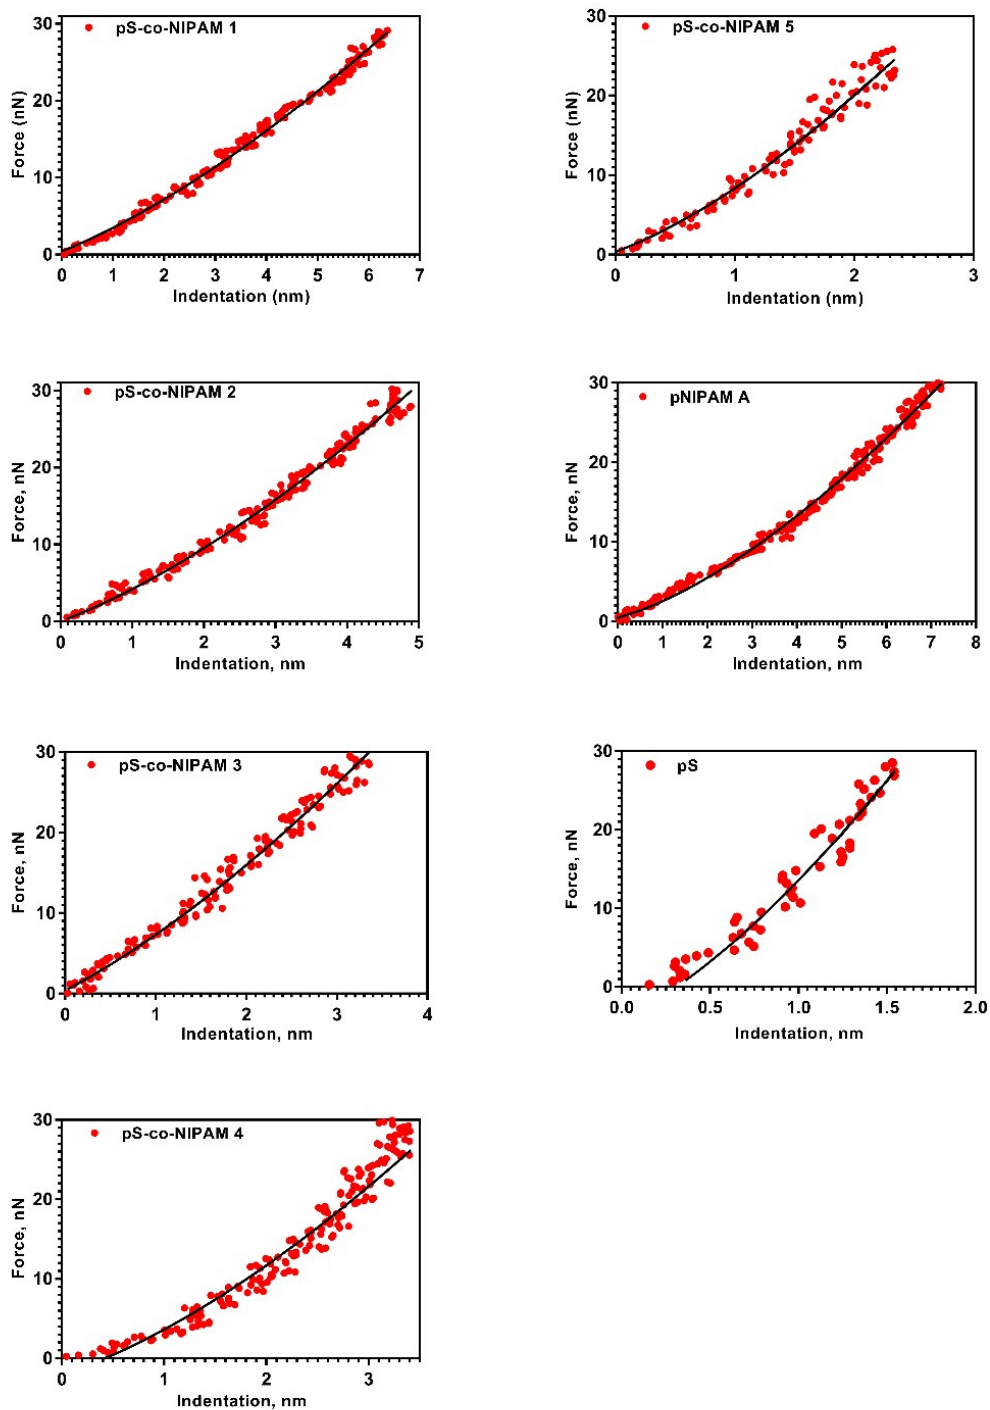

**Figure S3.** Illustrative example of the insensitivity of the predicted particle frequency calculation to  $V_L$ . For this example,  $D = 170$  nm and  $V_T = 1100$  m/s. The specific spheroidal mode  $(n,l)$  is shown in the legend.

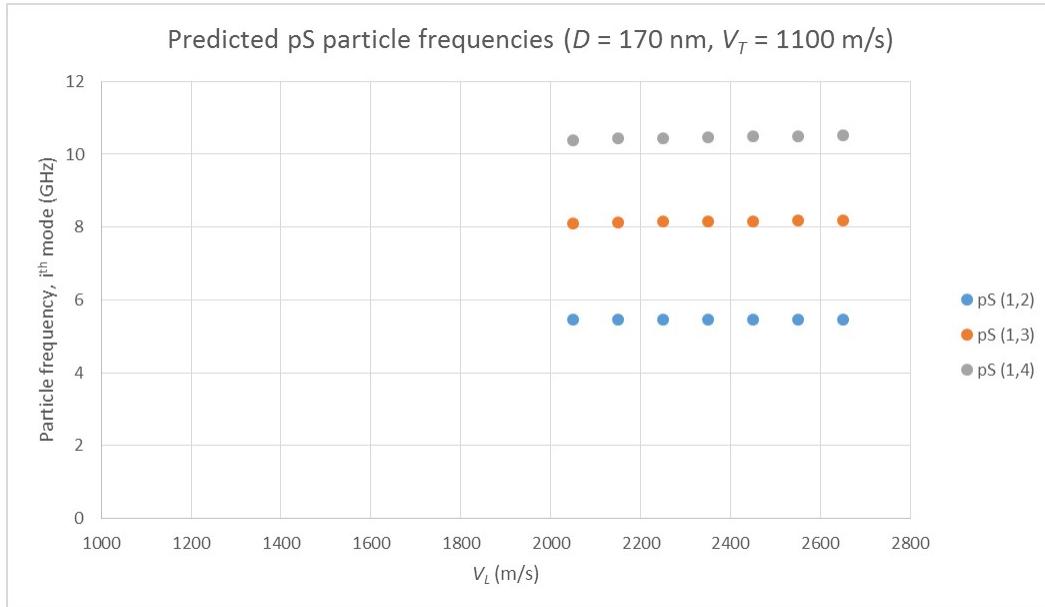

**Figure S4.** Log-log transformation of mechanical moduli provided from AFM nanoindentation and BLS.

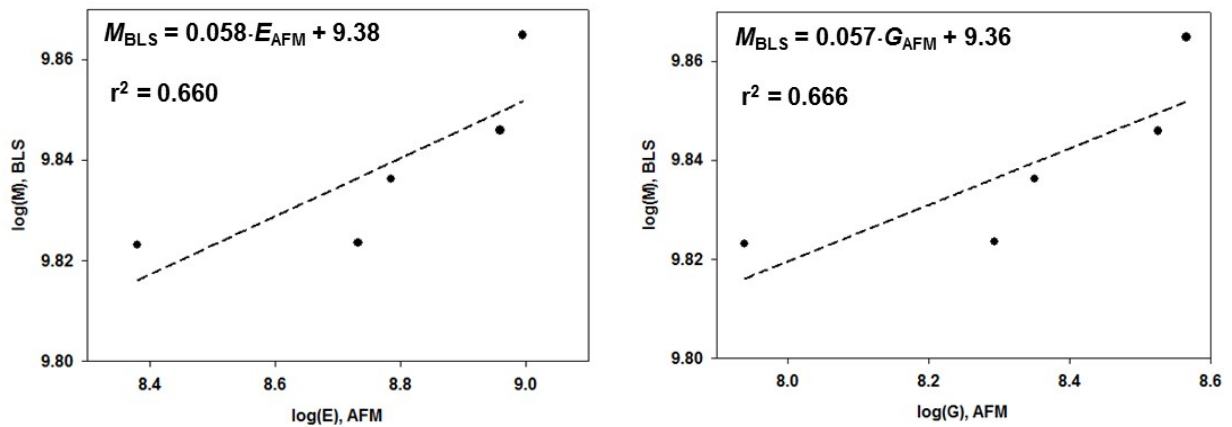

## References

1. Chung, P. C.; Glynos, E.; Green, P. F., The Elastic Mechanical Response of Supported Thin Polymer Films. *Langmuir* **2014**, *30* (50), 15200-15205.
2. Tan, S.; Sherman, R. L.; Ford, W. T., Nanoscale Compression of Polymer Microspheres by Atomic Force Microscopy. *Langmuir* **2004**, *20* (17), 7015-7020.
3. Johnson, K. L.; Kendall, K.; Roberts, A. D., Surface Energy and the Contact of Elastic Solids. *Proceedings of the Royal Society of London. A. Mathematical and Physical Sciences* **1971**, *324* (1558), 301-313.
4. Rupasinghe, T. P.; Hutchins, K. M.; Bandaranayake, B. S.; Ghorai, S.; Karunatilake, C.; Bučar, D. K.; Swenson, D. C.; Arnold, M. A.; Macgillivray, L. R.; Tivanski, A. V., Mechanical Properties of a Series of Macro- and Nanodimensional Organic Cocrystals Correlate with Atomic Polarizability. *Journal of the American Chemical Society* **2015**, *137* (40), 12768-12771.
5. Guo, D.; Li, J.; Xie, G.; Wang, Y.; Luo, J., Elastic Properties of Polystyrene Nanospheres Evaluated with Atomic Force Microscopy: Size Effect and Error Analysis. *Langmuir* **2014**, *30* (24), 7206-7212.
6. Hutter, J. L.; Bechhoefer, J., Calibration of atomic-force microscope tips. *Review of Scientific Instruments* **1993**, *64* (7), 1868-1873.
